# Supplementary material for: Novel phosphate ester extractant for preferential extraction of hafnium over zirconium and its mechanism
Source: Royal Society of Chemistry journal article supplement (doi:10.1039/d4nj00830h), 2024-01-01
Supplement: d4nj00830h1.pdf [file d4nj00830h1.pdf]

## Novel phosphate ester extractant for preferential extraction of hafnium over zirconium and its mechanism

Yanping Luo<sup>a</sup>, Chengjin Xu<sup>a</sup>, Jianhui Su<sup>a</sup>, Xiujing Peng<sup>a,b</sup>, Xiangfeng Kong<sup>a</sup>, Shuo Wang<sup>b</sup>, Jiahui Sun<sup>b</sup>, Yu Cui<sup>b</sup>, Yong Nie<sup>a</sup>, Xuchuan Jiang<sup>a\*</sup>, Guoxin Sun<sup>a,b\*</sup>

a. Institute for Smart Materials & Engineering, University of Jinan, Jinan 250022, PR China.

b. School of Chemistry and Chemical Engineering, University of Jinan, Jinan 250022, PR China.

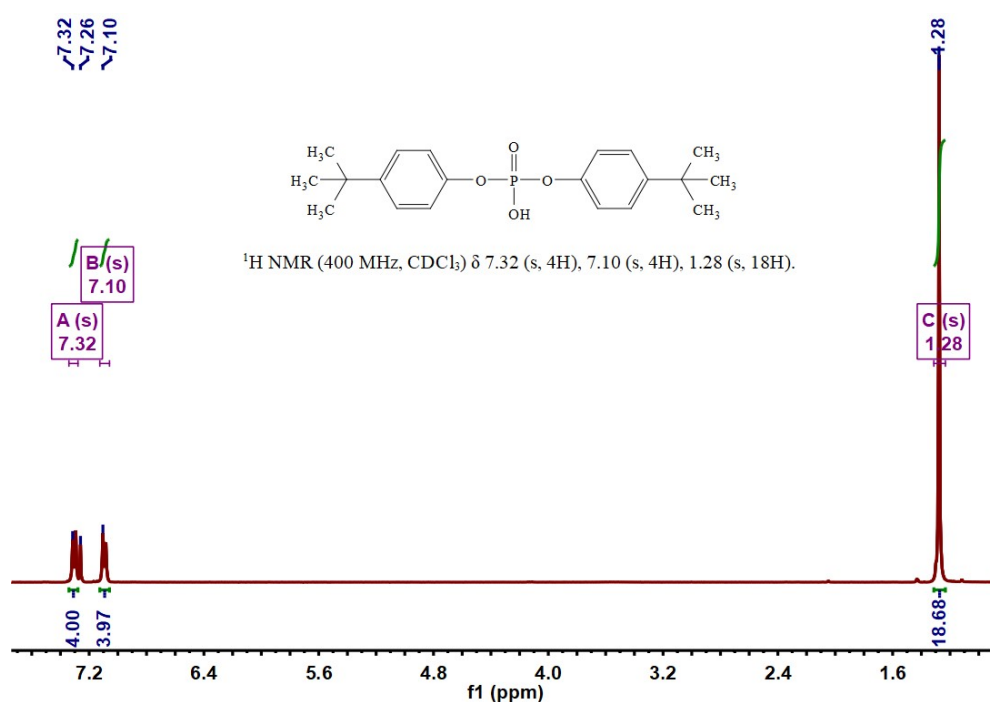

Fig.S1. <sup>1</sup>H NMR of DTBPPA in CDCl<sub>3</sub>
